# Supplementary material for: Exploring Potential Ways to Reduce the Carbon Emission Gap in an Urban Metabolic System: A Network Perspective
Source: MDPI journal article supplement (doi:10.3390/ijerph19105793), 2022-05-10
Supplement: s1 [file s1]

List of Supplemental Tables:

**Supplemental Table S1.** Different land use types areas in each year.

**Supplemental Table S2–S7.** Land transition matrix from 1990–2018.

**Supplemental Table S8.** IPCC carbon emission conversion coefficients for the energy types consumed in the study area.

**Supplemental Table S9.** Carbon emission conversion coefficients for the respiration accounting items.

**Supplemental Table S10.** The city's population and livestock numbers during the study period.

**Supplemental Table S11.** The conversion coefficients for carbon emission of cultivated land.

**Supplemental Table S12.** Carbon sequestration coefficients for the natural components of the urban network.

**Supplemental Table S13.** Categories for the total direct and integrated input flows for each component of Beijing's carbon metabolism.

**Supplemental Table S14.** Scenarios description in 2035 and 2060.

**Supplemental Table S15.** Carbon metabolic intensity for the different land use types in each year.

List of Supplemental Figure:

**Supplemental Figure S1.** Land use map for Beijing from 1990 to 2018.

**Supplemental Figure S2.** Digital elevation model map of Beijing.

**Supplemental Figure S3.** Areas of the different land use types areas from 1990 to 2018.

**Supplemental Figure S4.** Changes in the direct input flows from 1990 to 2018.

**Supplemental Figure S5.** Changes in the integrated (direct plus indirect) input flows from 1990 to 2018.

**Supplemental Table S1.** Area of each land use type throughout the study period in each year.

| Land use type | Area transferred (km <sup>2</sup> ) |          |           |          |          |          |          |              |
|---------------|-------------------------------------|----------|-----------|----------|----------|----------|----------|--------------|
|               | 1990                                | 1995     | 2000      | 2005     | 2010     | 2015     | 2018     | 2018-senario |
| C             | 5860.499                            | 4517.74  | 4920.2451 | 4538.813 | 4403.353 | 3936.36  | 3746.286 | 3746.286     |
| F             | 7288.56                             | 7772.063 | 7406.6409 | 7395.935 | 7387.056 | 7465.55  | 7523.478 | 8608.783     |
| G             | 1363.614                            | 1281.752 | 1294.5204 | 1295.976 | 1284.224 | 1339.197 | 1281.554 | 196.2495     |
| W             | 400.23                              | 591.138  | 514.3797  | 490.221  | 491.6178 | 369.2907 | 399.771  | 399.771      |
| U             | 484.8687                            | 1081.317 | 1034.8695 | 1299.526 | 1417.681 | 1548.772 | 1249.691 | 1249.691     |
| R             | 837.5436                            | 792.6885 | 1002.7035 | 1110.456 | 1115.42  | 1465.797 | 1891.825 | 1891.825     |
| T             | 149.3343                            | 330.3216 | 211.2885  | 253.7208 | 285.5259 | 244.197  | 273.2769 | 273.2769     |
| B             | 1.1502                              | 18.6597  | 1.1502    | 1.1502   | 0.9216   | 16.6356  | 19.9179  | 19.9179      |

C, cultivated land; F, forest; G, grassland; W, water; U, urban land; R, rural land; T, transportation and industrial land; B, bare land.

**Supplemental Table S2.** Land transition matrix from 1990 to 1995. Transfers are from the land use in the first column of the table to the land uses across the first row of the table.

| Land use type | Area transferred (km <sup>2</sup> ) |          |          |          |          |          |          |        |
|---------------|-------------------------------------|----------|----------|----------|----------|----------|----------|--------|
|               | C                                   | F        | G        | W        | U        | R        | T        | B      |
| C             | 4010.979                            | 607.8483 | 221.9517 | 169.1892 | 406.6056 | 258.1776 | 181.0332 | 4.7025 |
| F             | 226.0206                            | 6298.719 | 676.0512 | 26.3187  | 19.1331  | 18.2376  | 20.3553  | 3.5658 |
| G             | 117.1278                            | 804.3417 | 358.0209 | 57.8817  | 4.3407   | 4.8015   | 7.641    | 9.4455 |
| W             | 28.9674                             | 22.0437  | 10.0629  | 326.1645 | 9.5796   | 1.5543   | 1.8144   | 0.0243 |
| U             | 10.9368                             | 0.8064   | 0.8478   | 0.3663   | 463.1256 | 1.7505   | 6.7455   | 0.2898 |
| R             | 108.3285                            | 25.9335  | 8.7993   | 7.7859   | 141.7194 | 498.0933 | 46.7181  | 0.1647 |
| T             | 15.3081                             | 11.8269  | 5.7384   | 3.4236   | 36.8127  | 10.0701  | 66.0141  | 0.1404 |
| B             | 0.0612                              | 0.4905   | 0.2718   | 0        | 0        | 0        | 0        | 0.3267 |

C, cultivated land; F, forest; G, grassland; W, water; U, urban land; R, rural land; T, transportation and industrial land; B, bare land.

**Supplemental Table S3.** Land transition matrix from 1995 to 2000.

| Land<br>use type | Area transferred (km <sup>2</sup> ) |          |          |          |          |          |         |        |
|------------------|-------------------------------------|----------|----------|----------|----------|----------|---------|--------|
|                  | C                                   | F        | G        | W        | U        | R        | T       | B      |
| C                | 3803.541                            | 264.8088 | 108.4626 | 36.2745  | 61.0407  | 198.729  | 44.811  | 0.0612 |
| F                | 566.7525                            | 6339.785 | 785.6424 | 20.5443  | 3.5424   | 36.4878  | 18.7641 | 0.4905 |
| G                | 180.1746                            | 710.8398 | 353.2212 | 10.4895  | 1.2078   | 12.8709  | 12.6684 | 0.2718 |
| W                | 76.4604                             | 29.1546  | 28.0413  | 430.4394 | 3.3993   | 17.7795  | 5.8563  | 0      |
| U                | 66.1437                             | 19.6389  | 1.4787   | 9.0864   | 902.0286 | 65.1213  | 17.8191 | 0      |
| R                | 139.0752                            | 20.0124  | 3.627    | 2.6253   | 25.641   | 586.3905 | 15.3135 | 0      |
| T                | 83.6199                             | 18.72    | 4.6332   | 4.8771   | 37.6821  | 85.0563  | 95.733  | 0      |
| B                | 4.4658                              | 3.5244   | 9.4005   | 0.0243   | 0.3276   | 0.2673   | 0.3231  | 0.3267 |

C, cultivated land; F, forest; G, grassland; W, water; U, urban land; R, rural land; T, transportation and industrial land; B, bare land.

**Supplemental Table S4.** Land transition matrix from 2000 to 2005.

| Land use type | Area transferred (km <sup>2</sup> ) |          |          |          |          |          |          |        |
|---------------|-------------------------------------|----------|----------|----------|----------|----------|----------|--------|
|               | C                                   | F        | G        | W        | U        | R        | T        | B      |
| C             | 4526.942                            | 11.4183  | 2.0772   | 3.1239   | 170.2233 | 164.8854 | 41.5755  | 0      |
| F             | 0.0513                              | 7381.584 | 0.2799   | 1.2348   | 8.8515   | 9.0198   | 5.6196   | 0      |
| G             | 0.0027                              | 2.2869   | 1287.729 | 0.9063   | 1.1934   | 0.5229   | 1.8792   | 0      |
| W             | 10.9494                             | 0.3042   | 5.8698   | 484.4556 | 5.6223   | 3.7116   | 3.4659   | 0      |
| U             | 0.0009                              | 0        | 0        | 0.2349   | 1034.3   | 0.2313   | 0.1026   | 0      |
| R             | 0.2934                              | 0.108    | 0.0198   | 0.063    | 70.0542  | 927.7659 | 4.3992   | 0      |
| T             | 0.5742                              | 0.2331   | 0        | 0.2016   | 9.2817   | 4.3191   | 196.6788 | 0      |
| B             | 0                                   | 0        | 0        | 0        | 0        | 0        | 0        | 1.1502 |

C, cultivated land; F, forest; G, grassland; W, water; U, urban land; R, rural land; T, transportation and industrial land; B, bare land.

**Supplemental Table S5.** Land transition matrix from 2005 to 2010.

| Land use type | Area transferred (km <sup>2</sup> ) |          |          |          |          |          |          |        |
|---------------|-------------------------------------|----------|----------|----------|----------|----------|----------|--------|
|               | C                                   | F        | G        | W        | U        | R        | T        | B      |
| C             | 4369.487                            | 45.5373  | 0.0027   | 1.7856   | 56.8521  | 36.8784  | 28.2708  | 0      |
| F             | 23.616                              | 7341.397 | 0.027    | 13.6377  | 5.1507   | 2.9412   | 9.1647   | 0      |
| G             | 4.3119                              | 0.0369   | 1283.243 | 0.8514   | 2.2851   | 0.0198   | 5.2272   | 0      |
| W             | 3.3741                              | 0.018    | 0.5589   | 473.9247 | 6.1929   | 0.414    | 5.7384   | 0      |
| U             | 0.2133                              | 0.0225   | 0.0108   | 0.1179   | 1298.867 | 0.1386   | 0.1566   | 0      |
| R             | 1.3635                              | 0.036    | 0.0054   | 0.2196   | 36.7677  | 1071.377 | 0.6867   | 0      |
| T             | 0.9873                              | 0.0072   | 0.3771   | 1.08     | 11.5659  | 3.6504   | 236.0529 | 0      |
| B             | 0                                   | 0        | 0        | 0        | 0        | 0        | 0.2286   | 0.9216 |

C, cultivated land; F, forest; G, grassland; W, water; U, urban land; R, rural land; T, transportation and industrial land; B, bare land.

**Supplemental Table S6.** Land transition matrix from 2010 to 2015.

| Land use types | Area transferred (km <sup>2</sup> ) |          |          |          |          |          |         |        |
|----------------|-------------------------------------|----------|----------|----------|----------|----------|---------|--------|
|                | C                                   | F        | G        | W        | U        | R        | T       | B      |
| C              | 3210.439                            | 244.1124 | 97.7625  | 55.6263  | 184.2966 | 525.7044 | 78.0246 | 7.3863 |
| F              | 254.9952                            | 6951.72  | 25.0614  | 25.2414  | 16.2864  | 77.2335  | 36.1845 | 0.3339 |
| G              | 45.2196                             | 152.0514 | 1034.801 | 7.7526   | 1.6092   | 18.6723  | 21.6135 | 2.5047 |
| W              | 105.8949                            | 33.1776  | 51.3819  | 252.2286 | 10.6623  | 26.3817  | 6.8751  | 5.0148 |
| U              | 63.1116                             | 39.9924  | 82.7325  | 16.1145  | 1169.162 | 35.19    | 11.34   | 0.0378 |
| R              | 199.1484                            | 22.4046  | 18.8415  | 9.045    | 126.8991 | 712.6938 | 25.9254 | 0.4617 |
| T              | 57.5406                             | 22.0068  | 28.575   | 3.2688   | 39.7809  | 69.8364  | 64.1115 | 0.4059 |
| B              | 0.0099                              | 0.0855   | 0.0396   | 0.0135   | 0.0756   | 0.0846   | 0.1224  | 0.4905 |

C, cultivated land; F, forest; G, grassland; W, water; U, urban land; R, rural land; T, transportation and industrial land; B, bare land.



**Supplemental Table S7.** Land transition matrix from 2015 to 2018.

| Land use types | Area transferred (km <sup>2</sup> ) |          |          |          |          |          |          |         |
|----------------|-------------------------------------|----------|----------|----------|----------|----------|----------|---------|
|                | C                                   | F        | G        | W        | U        | R        | T        | B       |
| C              | 3742.341                            | 94.0941  | 1.0062   | 27.5319  | 23.0184  | 18.5571  | 24.489   | 5.3217  |
| F              | 0.9585                              | 7411.568 | 7.6158   | 7.1298   | 32.3928  | 1.8873   | 3.9987   | 0       |
| G              | 0.045                               | 11.205   | 1267.512 | 9.6696   | 47.5227  | 0.2781   | 2.8584   | 0.1062  |
| W              | 0.2106                              | 3.2238   | 0.18     | 353.2842 | 11.0016  | 0.3573   | 0.8676   | 0.1656  |
| U              | 0.1188                              | 0.0018   | 0.6138   | 0.0189   | 1129.837 | 418.1274 | 0.0549   | 0       |
| R              | 2.5659                              | 2.7918   | 2.6721   | 0.4923   | 0.5427   | 1449.089 | 7.6005   | 0.0423  |
| T              | 0.0459                              | 0.594    | 0.9477   | 0.2034   | 5.3757   | 3.5289   | 233.4078 | 0.0936  |
| B              | 0                                   | 0        | 1.0062   | 1.4409   | 0        | 0        | 0        | 14.1885 |

C, cultivated land; F, forest; G, grassland; W, water; U, urban land; R, rural land; T, transportation and industrial land; B, bare land.

**Supplemental Table S8.** IPCC carbon emission conversion coefficients for the energy

types consumed in the study area <sup>a</sup>.

| Energy type           | Coefficient | Energy type | Coefficient | Energy type             | Coefficient |
|-----------------------|-------------|-------------|-------------|-------------------------|-------------|
| Washed coal           | 0.7559      | Coal        | 0.7559      | Coke oven gas           | 0.3548      |
| Other coking products | 0.6449      | Coke        | 0.855       | Other petroleum         | 0.5857      |
| Crude oil             | 0.5857      | Gasoline    | 0.5538      | Liquefied petroleum gas | 0.5042      |
| Other gas             | 0.3548      | Kerosene    | 0.5714      | Fuel oil                | 0.6185      |
| Refinery gas          | 0.4602      | Diesel      | 0.5921      | Natural gas             | 0.4483      |

<sup>a</sup> The carbon emission conversion coefficients were obtained from IPCC (2006) [65].

**Supplemental Table S9.** Carbon emission conversion coefficients for the respiration accounting items.

| Accounting item                                                          | Coefficient |        |
|--------------------------------------------------------------------------|-------------|--------|
|                                                                          | Pig         | Cattle |
| Gastrointestinal fermentation (kg/head • yr <sup>-1</sup> ) <sup>a</sup> | 1           | 47.8   |
| a                                                                        | 3.5         | 1      |
| b                                                                        | 82          | 796    |
| b                                                                        | 79          |        |

<sup>a</sup> The carbon emission conversion coefficients for animal gastrointestinal fermentation and excreta were obtained from IPCC (2006) [65]; <sup>b</sup> the animal breathing coefficients were obtained from Kuang et al. (2010) [104] and the human respiratory coefficients were obtained from Fang (1996b) [105].

**Supplemental Table S10.** The city's population and livestock numbers during the study period.

| Year | Urban population<br>( $\times 10^4$ ) | Rural population<br>( $\times 10^4$ ) | Cattle<br>( $\times 10^4$ ) | Pigs<br>( $\times 10^4$ ) |
|------|---------------------------------------|---------------------------------------|-----------------------------|---------------------------|
| 1990 | 798.0                                 | 288.0                                 | 10.8                        | 187.7                     |
| 1995 | 946.2                                 | 304.9                                 | 13.8                        | 253.4                     |
| 2000 | 1057.4                                | 306.2                                 | 18.8                        | 250.0                     |
| 2005 | 1286.1                                | 251.9                                 | 24.4                        | 218.8                     |
| 2010 | 1686.4                                | 275.5                                 | 20.69                       | 183.13                    |
| 2015 | 1877.7                                | 292.8                                 | 17.48                       | 165.61                    |
| 2018 | 1863.4                                | 290.8                                 | 10.6                        | 45.4                      |

**Supplemental Table S11.** The conversion coefficients for carbon emission of cultivated land.

| Items <sup>a</sup> | Coefficient | Unit               | Source                        |
|--------------------|-------------|--------------------|-------------------------------|
| $f$                | 0.858       | kg/kg              | (West and Marland 2002) [106] |
| $s$                | 1647        | kg/km <sup>2</sup> |                               |
| $a$                | 0.18        | kg/kw              |                               |
| $s_I$              | 26648       | kg/km <sup>2</sup> |                               |

<sup>a</sup>  $f$ , the mass of fertilizer;  $s$ , the area of irrigated land;  $a$ , the total use of agriculture machinery (represented by the engine power);  $s_I$ , the area of dry cultivated land.

**Supplemental Table S12.** Carbon sequestration coefficients for the natural components of the urban network.

| Type <sup>a</sup> | Coefficient | Unit                                 | Source                                                                     |
|-------------------|-------------|--------------------------------------|----------------------------------------------------------------------------|
| C                 | -0.0007     | kgC m <sup>-2</sup> yr <sup>-1</sup> | He (2006) [107]<br>Fang et al. (1996a) [108]                               |
| F                 | -0.047      | kgC m <sup>-2</sup> yr <sup>-1</sup> | Piao et al. (2005) [109]<br>Fang et al. (2007) [110]                       |
| G                 | -0.0092     | kgC m <sup>-2</sup> yr <sup>-1</sup> | Piao et al. (2005) [109]<br>Fang et al. (2007) [110]<br>Walsh (1991) [111] |
| W                 | -0.04       | kgC m <sup>-2</sup> yr <sup>-1</sup> | Meybeck (1993) [112]<br>Duan et al. (2008) [113]                           |

<sup>a</sup> C, cultivated land; F, forest; G, grassland; W, water.

**Supplemental Table S13.** Categories for the total direct and integrated input flows for each component of Beijing's carbon metabolism. Ranges were calculated using the Natural Breaks method provided by ArcGIS. Integrated flows represent the total direct plus indirect flows.

| Category                                         | Gradient degree |        |         |          |           |
|--------------------------------------------------|-----------------|--------|---------|----------|-----------|
|                                                  | V               | IV     | III     | II       | I         |
| Direct/Integrated flows (kt C yr <sup>-1</sup> ) | 0–76            | 76–235 | 235–760 | 760–1400 | 1400–5000 |

**Supplemental Table S14.** Scenarios description in 2035 and 2060.

| <b>Year</b> | <b>GDP</b>                 | <b>Population</b>       | <b>Livestock</b>         | <b>Energy consumption</b>                      |
|-------------|----------------------------|-------------------------|--------------------------|------------------------------------------------|
| 2035        | Increase by 5%<br>per year | At 23 million<br>people | Keep the same as<br>2018 | Reduce primary<br>energy consumption<br>by 40% |
| 2060        | Increase by 5%<br>per year | At 23 million<br>people | Keep the same as<br>2018 | Reduce primary<br>energy consumption<br>by 81% |

Note: GDP and population are based on the 14th-Five-year in Beijing; Energy consumption is based on the Energy Plan of Beijing in the 14th-Five-year and the “Prospect of Energy and Power Development in China (2020 Edition)”.



**Supplemental Table S15.** Carbon metabolic intensity (C emission or sequestration per unit area) for the different land use types in each year. Positive values represent net emission; negative values represent net sequestration.

| Land use type <sup>a</sup> | Carbon emission or sequestration (kg C/m <sup>2</sup> ) |          |          |          |          |          |          |          |          |
|----------------------------|---------------------------------------------------------|----------|----------|----------|----------|----------|----------|----------|----------|
|                            | 1990                                                    | 1995     | 2000     | 2005     | 2010     | 2015     | 2018     | 2035     | 2060     |
| C                          | 0.031094                                                | 0.047785 | 0.043485 | 0.033414 | 0.031237 | 0.0284   | 0.028598 | 0.012756 | 0.011937 |
| F                          | -0.047                                                  | -0.047   | -0.047   | -0.047   | -0.047   | -0.047   | -0.047   | -0.047   | -0.047   |
| G                          | -0.0092                                                 | -0.0092  | -0.0092  | -0.0092  | -0.0092  | -0.0092  | -0.0092  | -0.0092  | -0.0092  |
| W                          | -0.04                                                   | -0.04    | -0.04    | -0.04    | -0.04    | -0.04    | -0.04    | -0.04    | -0.04    |
| U                          | 4.1430                                                  | 1.8413   | 1.7684   | 2.4349   | 5.118582 | 5.161751 | 5.704265 | 2.568356 | 1.005924 |
| R                          | 1.3968                                                  | 1.6477   | 1.2348   | 1.1615   | 1.392183 | 1.026444 | 0.2017   | 0.248109 | 0.195264 |
| T                          | 48.8088                                                 | 32.3427  | 56.0352  | 53.1613  | 40.7464  | 41.14798 | 40.47803 | 25.9328  | 8.318687 |
| B                          | 0                                                       | 0        | 0        | 0        | 0        | 0        | 0        | 0        | 0        |

<sup>a</sup> C, cultivated land; F, forest; G, grassland; W, water; U, urban land; R, rural land; T, transportation and industrial land; B, bare land.

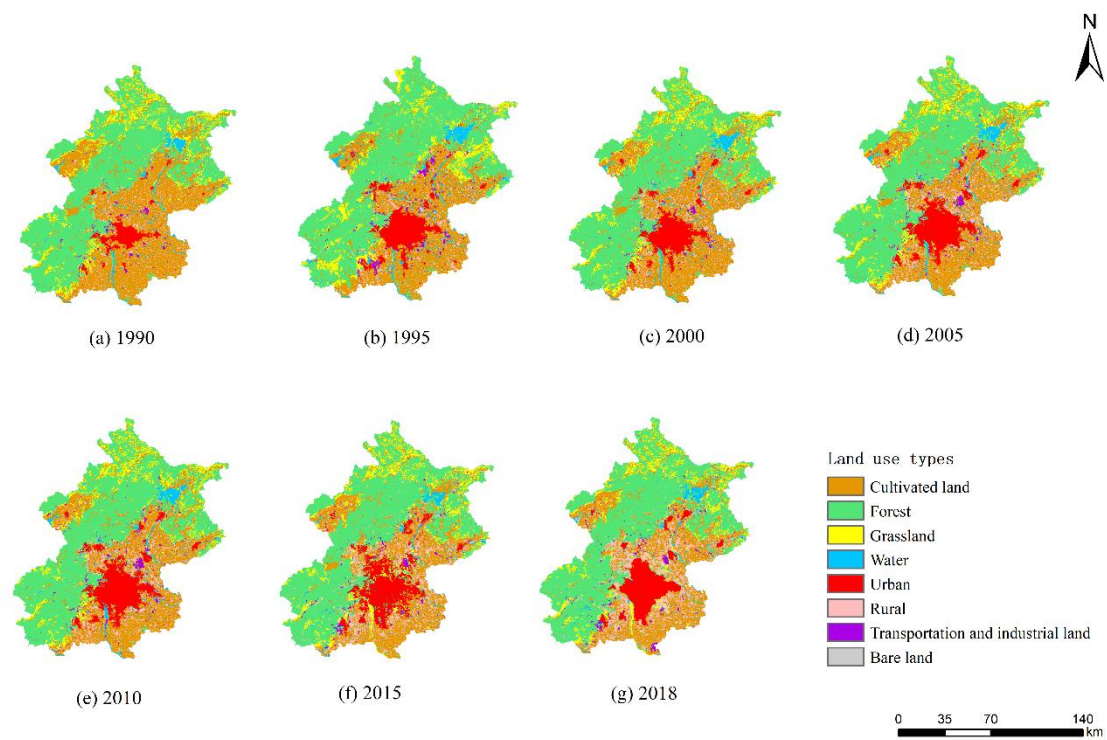

**Supplemental Figure S1.** Land use maps of Beijing from 1990 to 2018.

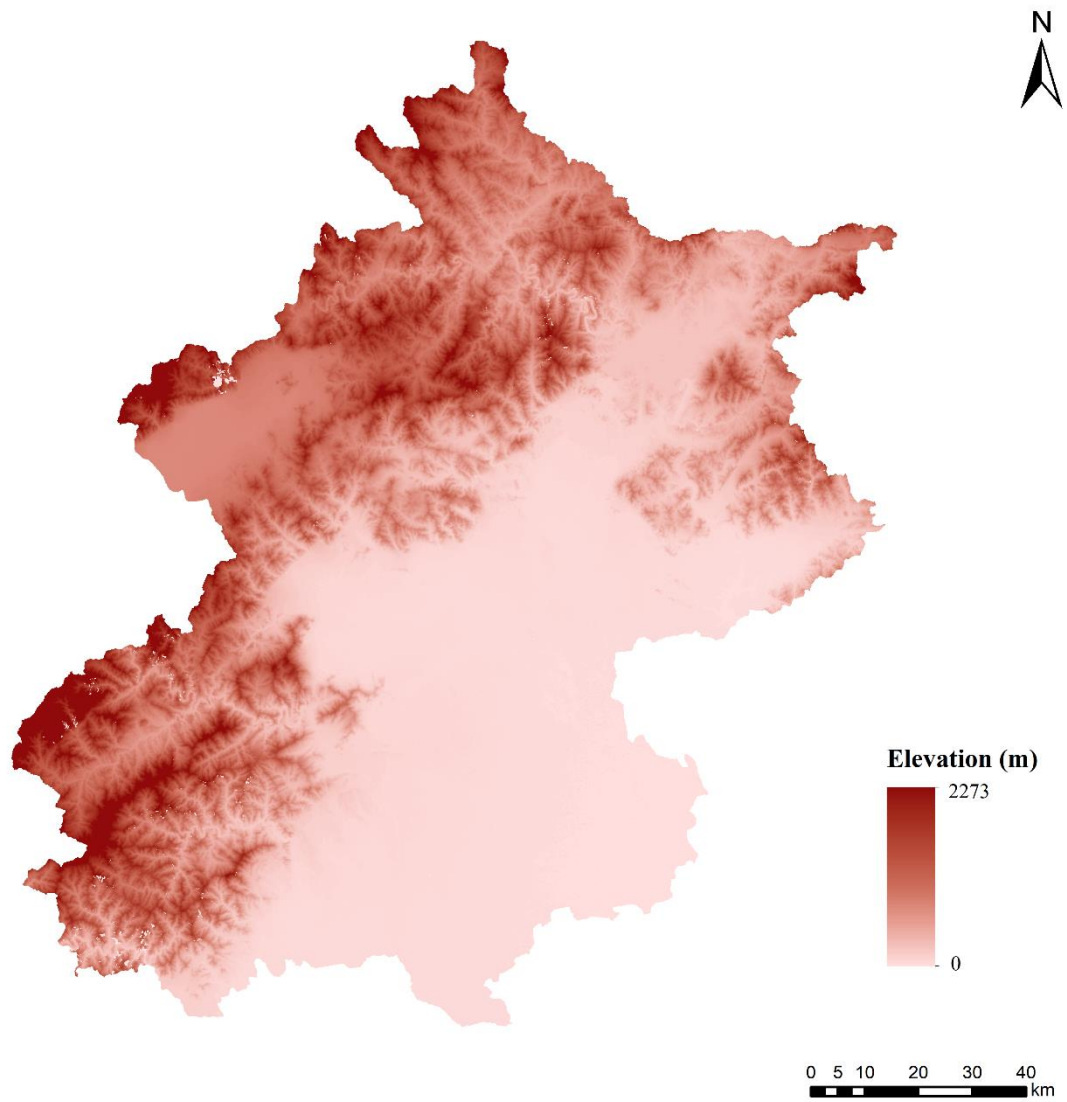

**Supplemental Figure S2.** Digital elevation model map of Beijing. Source: Institute of Geographic Sciences and Natural Resources Research.

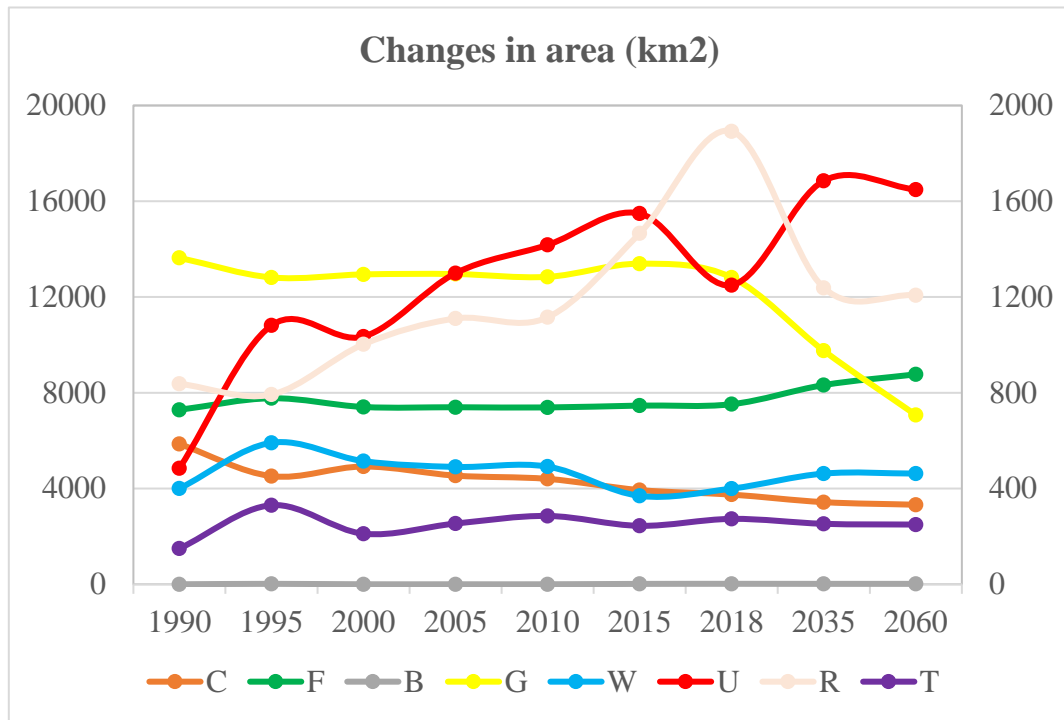

**Supplemental Figure S3.** Areas of the different land use types areas from 1990 to 2018.

Note: C, cultivated land; F, forest; G, grassland; W, bodies of water; U, urban land; R, rural; T, transportation and industrial land; B, bare land; the data of T, R, U, W, G belong to the secondary axis.

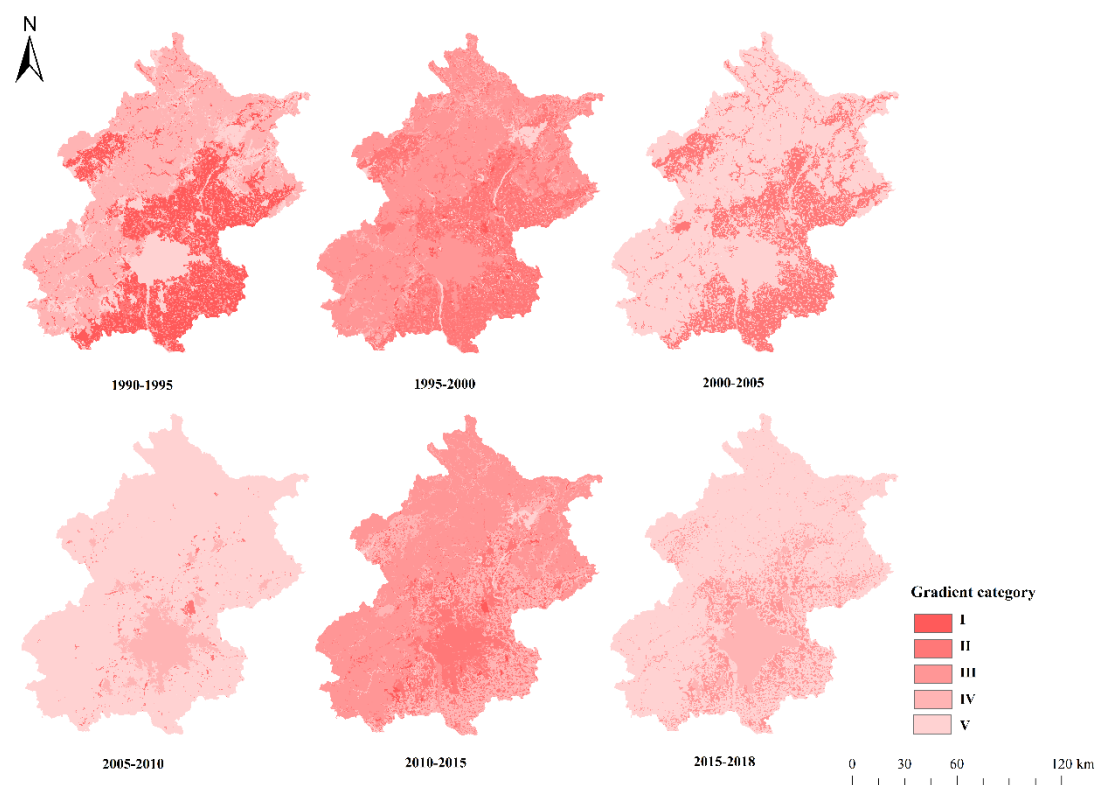

**Supplemental Figure S4.** Changes in the direct input flows from 1990 to 2018.

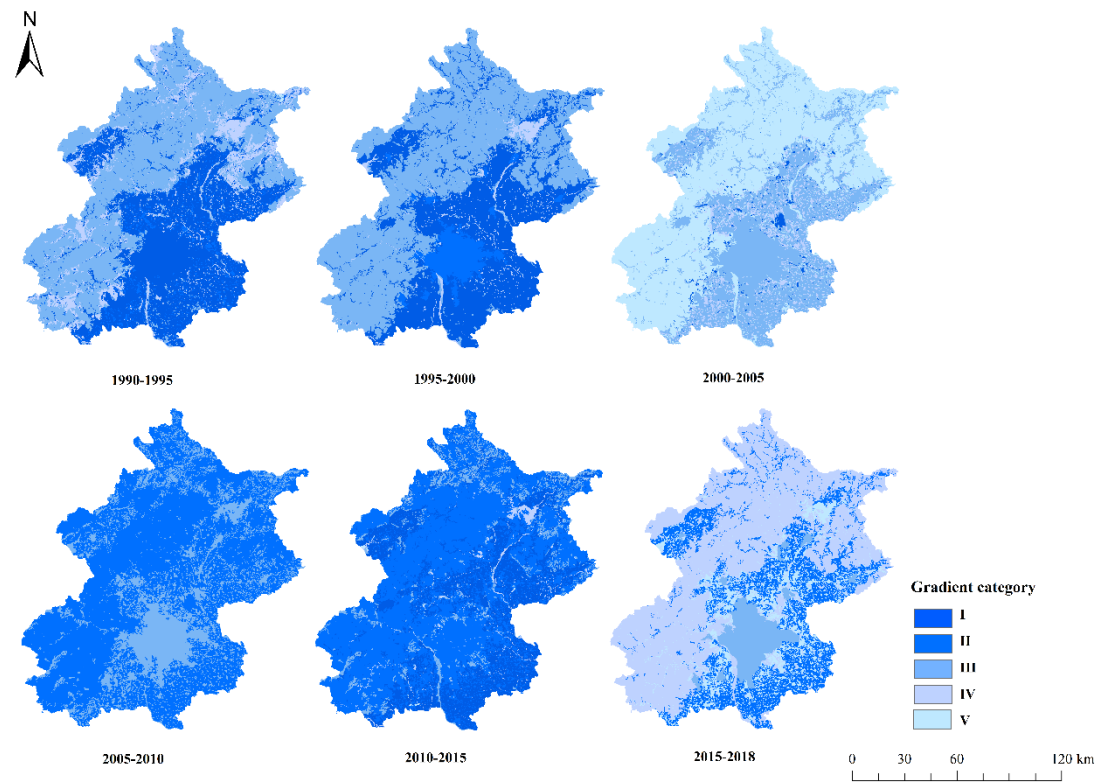

**Supplemental Figure S5.** Changes in the integrated (direct plus indirect) input flows from 1990 to 2018.
